# Supplementary material for: Current knowledge of Holothuriida (Holothuroidea: Echinodermata) from Brazil
Source: Frontiers journal article supplement (doi:10.3389/fmars.2024.1333253), 2024-04-02
Supplement: Table_1.DOCX [file Table_1.DOCX]

Supplementary Material

# 1 Tables with the studies and values used to prepare the graphics.

## Studies found in databases and used in analysis.

| 1. Alves O.F.S, Cerqueira W. R. P. (2000). Echinodermata das praias de Salvador (Bahia, Brasil). *Rev Bras Zool*. 17 (2), 543-53. https://doi.org/10.1590/S0101-81752000000200024 |
| --- |
| 1. Alitto R.A.S., Bueno M.L., Di Domenico M., Borges M. (2016). Annotated checklist of Echinoderms from Araçá Bay, Southeastern Brazil. *Check List* 12 (1), 1836. doi: http://dx.doi.org/10.15560/12.1.1836 |
| 1. Aquino-Souza R., Gomes-Filho J. (2023). Where are the juveniles of the gray sea cucumber *Holothuria (Halodeima) grisea*?. *Lat. Am. J. Aquat. Res.* 51 (2), 316-323. doi:10.3856/vol51-issue2-fulltext-2938 |
| 1. Araújo, P.A.D. (2022). *Aspectos comportamentais e fisiológicos da aprendizagem não associativa em Holothuroidea*. Master's Dissertation, Instituto de Biociências, University of São Paulo, São Paulo. doi:10.11606/D.41.2022.tde-21032023-190940. |
| 1. Bueno M.L., Tavares Y.A.G., di Domenico M., Borges M. (2015). Gametogenesis and weight change of body organs of the sea cucumber *Holothuria (Halodeima) grisea* (Aspidochirotida: Holothuriidae) in Southern Brazil. Revista de Biologia Tropical 63, 285-296. DOI: 10.15517/rbt.v63i2.23163 |
| 1. Campos L.S., Barboza C.A., Alcântara P.F., Moura R.B., Frensel R., Wanderley P. (2010). Echinodermata. In: Lavrado, H.P., Brasil, M.S. (Orgs.). *Biodiversidade da região oceânica profunda da Bacia de Campos: Megafauna e ictiofauna demersal*. Rio de Janeiro: SAG Serv., 62-63. |
| 1. Campos L. S., Moura R. B., Veríssimo I., Curbelo-Fernandez M. P., Cavalcanti G. H., Brasil A.C.S. (2010). ROV Imaging of Deep-Sea Echinoderms From the Brazilian Continental Margin, Southwest Atlantic, in *Echinoderms*: Durham. Proc. Of the 12th Int. Echinoderm Conf. Eds. Harris L. G., Böttger S. A., Walker C. W., Lesser M. P. (Balkema, Leiden), 147-152. |
| 1. Castellano G., Santos I., Freire C. (2018). Maintenance of ionic gradients and tissue hydration in the intertidal sea cucumber *Holothuria grisea* under hypo- and hyper-salinity challenges. J*ournal of the Marine Biological Association of the United Kingdom* 98 (2), 325-332. doi:10.1017/S0025315416001314 |
| 1. Cerqueira W. R. P. (2021). Probable mortality of *Holothuria (Halodeima) grisea* (Selenka,1867) (Echinodermata, Holothuroidea) after acute impact of oil spill in the northeast of Brazil in 2019. A*rquivo de Ciências do Mar* 54(1), 61-68. |
| 1. Costa, P. B. da. (2010). Sobrevivência, crescimento e capacidade de reciclagem de matéria orgânica do pepino-do-mar *Holothuria grisea* Selenka, 1867 (Echinodermata: Holothuroidea: Aspidochirotida). Dissertação de mestrado, Universidade Federal de Santa Catarina, Centro de Ciências Agrárias, Programa de Pós-Graduação em Aquicultura, Florianópolis, Santa Catarina. |
| 1. De Souza M.E.M., Leite L.V., Pinheiro R.R.R., De Sousa Jr. J., Nunes J.F., Salmito-Vanderley C.S.B. (2014). Gonadal index *Holothuria grisea* in Ceará. *Acta Veterinaria Brasilica* 8 (2), 229-230. |
| 1. Delboni C.G.M. (2008). Biologia celular da esqueletogênese e processos de mineralização em Holothuroidea (Echinodermata). Tese de Doutorado, Instituto de Biociências, Universidade de São Paulo, São Paulo. doi:10.11606/T.41.2008.tde-02022009-144343. |
| 1. Dias Í. F. (2012). Distribuição espaço-temporal e densidade populacional de *Holothuria (Halodeima) grisea* (Holothuroidea: Aspidochirotida) na Praia de Bitupitá, Ceará, Nordeste do Brasil. Dissertação de mestrado. Universidade Federal do Ceará. |
| 1. Diniz G., Barbarino E., Oiano-Neto J., Pacheco S., Lourenço S. (2017). Proximate composition of marine invertebrates from tropical coastal waters, with emphasis on the relationship between nitrogen and protein contents. *Lat. Am. J. Aquat. Res.* 42 (2), 332-352. doi:10.3856/vol42-issue2-fulltext-5 |
| 1. Fabricio M., Mendes A.W.C., Marenzi A., Di Domenico M. (2006). Population patterns and seasonal observations on density and distribution of *Holothuria grisea* (Holothuroidea: Aspidochirotida) on the Santa Catarina Coast, Brazil. *SPC Beche-de-mer Information Bulletin #23.* |
| 1. Fernandes M.L.B., Tommasi L.R., Lima E.J.B. (2002). Filo Echinodermata de Pernambuco. In: Tabarelli, M., Silva, J.M.C. (orgs.). *Diagnóstico da biodiversidade de Pernambuco*. Recife, Editora Massangana. p. 722. |
| 1. Ferreira M. D. (2016). Crescimento, sobrevivência e desenvolvimento larval do Pepino do mar Holothuria grisea: alimentação com diferentes microalgas. Dissertação de Mestrado. Universidade Federal do Ceará, Fortaleza. |
| 1. Gondim A.I., Dias T.L.P., Christoffersen M.L. (2013). Echinoderms from Maranhão and Piauí States, Northeastern Brazil. Check List 9(3), 510-518. https://doi.org/10.15560/9.3.510 |
| 1. Gondim A.I., Lacouth P., Alonso C., Manso C.L.C. (2008). Echinodermata da Praia do Cabo Branco, João Pessoa, Paraíba, Brasil. Biota Neotropica 8 (2), 151–159. https://doi.org/10.1590/S1676-06032008000200016 |
| 1. Leite-Castro L.V., de Souza Junior J., Salmito-Vanderley C.S.B., Nunes J.F., Hamel J.-F., Mercier A. (2016). Reproductive biology of the sea cucumber *Holothuria grisea* in Brazil: importance of social and environmental factors in breeding coordination. *Marine Biology* 163 (3). DOI: 10.1007/s00227-016-2842-x |
| 1. Lima E.J.B., Fernandes M.L.B. (2009). Diversidade de equinodermos (Echinodermata) no Estado de Pernambuco (Brasil). *Revista Brasileira de Zoociências* 11 (1), 55-63. |
| 1. Magalhães W.F., Martins L.R., Alves O.F.S. (2005). Inventário dos Echinodermata do Estado da Bahia. *Brazilian Journal of Aquatic Science and Technology* 9 (1), 61-65. |
| 1. Martins L. Estudo Taxonômico dos Holothuroidea (Echinodermata) de águas rasas da costa Brasileira. (2013). Dissertação de mestrado. Universidade Federal da Bahia. |
| 1. Martins L., Costa K.B., Toledo F. (2023). Disarticulated ossicles of sea cucumbers from the Campos Basin, Brazil: A new perspective into the discovery of diversity of Holothuroidea (Echinodermata). Holocene. DOI: 10.1177/09596836231197764 |
| 1. Martins L., Souto C., Braga J., Tavares M. (2018). Echinoidea and Holothuroidea (Echinodermata) of the Trindade and Martin Vaz Archipelago, off Brazil, with new records and remarks on taxonomy and species composition. J*ournal of the Marine Biological Association of the United Kingdom* 98 (3), 521-555. doi:10.1017/S0025315416001569 |
| 1. Martins L., Souto C., Menegola C. (2012). First record of *Holothuria* (*Theelothuria*) *princeps* and *Thyone pawsoni* (Echinodermata: Holothuroidea) in the South Atlantic Ocean. *Marine Biodiversity Records* 5, E98. doi:10.1017/S1755267212000796 |
| 1. Melo A.A., Carneiro R.F., Silva W.M., Moura R.M., Silva G.C., Sousa O.V., Saboya J.F.P., Nascimento K.S., Saker-Sampaio S., Nagano C.S., Cavada B.S., Sampaio A.H. (2014). HGA-2, a novel galactoside-binding lectin from the sea cucumber *Holothuria grisea* binds to bacterial cells. *International Journal of Biological Macromolecules* 64, 435-442. |
| 1. Mendes F.M., Marenzi A.W.C., Di Domenico M. (2006). Caractéristiques des populations d’Holothuria grisea (Holothuroidea: Aspidochirotida) sur la côte de Santa Catarina, au Brésil, et observations saisonnières de leur densité et de leur répartition. *La bêche-de-mer, Bulletin de la CPS n° 23.* |
| 1. Miranda A.L.S., Sovierzoski H.H., Correia M.D. (2015). Holothuroidea (Echinodermata) from reef ecosystems on the central coast of Alagoas, Brazil, with a new record to South Atlantic Ocean. *Cahiers de Biologie Marine* 56 (2), 111-125. |
| 1. Miranda A.L.S., Lima M.L.F., Sovierzoski H.H., Correia M.D. (2012). Inventory of the Echinodermata collection from the Universidade Federal de Alagoas. *Biota Neotropica* 12 (2), 135-146. https://doi.org/10.1590/S1676-06032012000200014 |
| 1. Moura, R. B. (2016). Taxonomia e distribuição de holoturias (Echinodermata, Holothuroidea) do mar profundo brasileiro. Tese de Doutorado. Universidade Federal de Pernambuco. |
| 1. Moura R.B., Campos L.S, Curbelo-Fernandez P.M., Cavalcanti G.H. (2010). Synallactidae (Echinodermata: Holothuroidea) from Campos Basin, Southwest Atlantic. In: Harris, L.G., Böttger, S.A., Walker, C.H. & Lesser, M.P. (Eds.), Echinoderms: Durham. Taylor & Francis Group, London, 245–249. |
| 1. Moura R.M., Melo A.A., Carneiro R.F., Rodrigues C.R.F., Delatorre P., Nascimento K.S., Saker-Sampaio S., Nagano C.S., Cavada B.S., Sampaio A.H. (2015). Hemagglutinating/Hemolytic activities in extracts of marine invertebrates from the Brazilian coast and isolation of two lectins from the marine sponge *Cliona varians* and the sea cucumber *Holothuria grisea. Anais da Academia Brasileira de Ciencias* 87 (2), 973-984. DOI: 10.1590/0001-3765201520140399 |
| 1. Moura R.d.M., Aragão K.S., de Melo A.A., Carneiro R.F., Osório C.B.H., Luz P.B., de Queiroz A.F.S., dos Santos E.A., de Alencar N.M.N., Cavada B.S. (2013). *Holothuria grisea* agglutinin (HGA): the first invertebrate lectin with anti-inflammatory effects. *Fundam Clin Pharmacol* 27, 656-668. https://doi.org/10.1111/j.1472-8206.2012.01073.x |
| 1. Netto L. F., Hadel V. F., Tiago C. G. (2005). Echinodermata from São Sebastião Chanel (São Paulo, Brazil). *Revista de Biología Tropical* 53 (S3), 207-218. https://doi.org/10.15517/rbt.v53i3.26777 |
| 1. Oliveira J. P. de. (2013). Holothuroidea (Echinodermata) da região Nordeste do Brasil. Dissertação de Mestrado. Universidade Federal da Paraíba, João Pessoa, 222 p. |
| 1. Oliveira J.P., Oliveira J., Manso C.L.C. (2010). Inventário da coleção de equinodermos do LABIMAR, Campus Profº. Alberto Carvalho, Universidade Federal de Sergipe. *Scientia Plena* 6 (2), 1–14. |
| 1. Pereira V.A., Forte J.M., Arruda-Júnior J.P.V. et al. (2018). Identification and characterization of microsatellite loci in West Atlantic sea cucumber *Holothuria grisea* (Selenka 1867). *J Genet* 97, 1363-1369. https://doi.org/10.1007/s12041-018-1022-9 |
| 1. Pereira V.A. Caracterização comportamental, morfológica e genética do sexo em pepino do mar *Holothuria grisea* (Selenka, 1987), no Nordeste do Brasil. (2017). Dissertação de Mestrado. Universidade Federal do Ceará, Fortaleza. |
| 1. Pereira T.M., Mattar L.P., Pereira E.R. et al. (2017). Effects of Tin on Enzyme Activity in *Holothuria grisea* (Echinodermata: Holothuroidea). *Bull Environ Contam Toxicol* 98, 607-611. https://doi.org/10.1007/s00128-016-1992-3 |
| 1. Pereira E.R., Cogo A.J.D., Cruz Z.M.A. (2014). Biomarcadores enzimáticos em *Holothuria grisea* (Selenka, 1867) expostas ao chumbo, cádmio e cobre. *Natureza online* 12 (1), 1-9. |
| 1. Ponte, I. de A. R. (2017). A pesca, processamento artesanal e qualidade microbiológica do produto final do pepino do mar *Holothuria grisea* Selenka, 1867 (Echinodermata: Holothuroidea) no extremo litoral Oeste do Ceará. Dissertação de mestrado. Universidade Federal do Ceará. |
| 1. Ponte I.D.A.R., Feitosa C.V. (2019). Evaluation of an unreported and unregulated sea cucumber fishery in eastern Brazil. *Ocean and Coastal Management* 167, 1-8. DOI: 10.1016/j.ocecoaman.2018.09.016 |
| 1. Prata J., Lucena R.A., Lima S.F.B., Weverton S., Souza S., Christoffersen M.L. (2020). Species richness of Pycnogonida and Echinodermata associated with the reef ecosystems of Morro de São Paulo on Tinharé Island in Northeastern Brazil. *International Journal of Development Research* 10 (4), 34943-34951. |
| 1. Prata J., Stevenson V., Silva J. et al. (2020). Echinodermata from Barra de Mamanguape, Northeast of Brazil, Tropical Southwestern Atlantic. *Thalassas* 36, 273-289. https://doi.org/10.1007/s41208-020-00214-y |
| 1. Prata J., Christoffersen M. L. (2017). Checklist of the Holothuroidea (Echinodermata) from the State of Paraíba, Brazil. *Pesquisa e Ensino em Ciências Exatas e da Natureza* 1 (1), 45-59. 2017. |
| 1. Prata J., Manso C.L.C., Christoffersen M.L. (2014). Aspidochirotida (Echinodermata: Holothuroidea) from the northeast coast of Brazil. *Zootaxa*, 3889 (1), 127-150. https://doi.org/10.11646/zootaxa.3889.1.8 |
| 1. Prata J., Dias T., Christoffersen M. (2014). Occurrence of *Holothuria* (*Holothuria*) *dakarensis* (Holothuroidea: Echinodermata) in the south-western Atlantic, with notes on distribution and ecology. Marine Biodiversity Records 7, E9. doi:10.1017/S1755267214000049 |
| 1. Prata J., Christoffersen M. L. (2012). *Holothuria (Semperothuria) surinamensis* Ludwig, 1875 (Echinodermata: Holothuroidea): Record of the species for the northeast coast of Brazil. *Check List* 8 (4), 768-770. |
| 1. Queiroz V., Mauro M., Arizza V., Custódio M.R., Vazzana M. (2022). The use of an integrative approach to identify coelomocytes in three species of the genus *Holothuria* (Echinodermata). *Invertebrate Biology* 141 (1), e12357. https://doi.org/10.1111/ivb.12357 |
| 1. Queiroz V., Sales L., Neves E., Johnsson J. (2013). Holotúrias do litoral da Bahia (Echinodermata: Holothuroidea): inventário e novos registros. *Arquivos de Ciências do Mar* 46 (2), 107-112. |
| 1. Queiroz V., De Souza L., Pimenta A., Cunha C. (2013). New host records to *Melanella* (Caenogastropoda: Eulimidae) from the Brazilian coast. *Marine Biodiversity Records* 6, E67. doi:10.1017/S1755267213000407 |
| 1. Reis F.Y.T., Pereira V. A., Arruda Júnior, J.P.V., Maggioni, R., Ferreira, Y.M., Vanderley, C. S.B.S. (2019). Desenho de primers e estudo da estrutura genética em pepino do mar. *CiÃªnc. Anim.* 29 (1), 70-74. |
| 1. Rocha P. E. (2014). Alterações enzimáticas e histológicas em *Holothuria grisea* expostas ao cloreto de estanho IV. Dissertação de Mestrado. Universidade Federal de Vila Velha, Vila Velha, Espírito Santo. |
| 1. Rupp S.G., Marenzi A.W.C., Souza R.V., Martins L. (2023). Sea Cucumbers (Echinodermata: Holothuroidea) from Santa Catarina Coast, Southern Brazil, with Notes on Their Abundance and Spatial Distribution. J*ournal of Shellfish Research* 42 (1), 143-153. https://doi.org/10.2983/035.042.0115 |
| 1. Santos F. L. B. dos. (2016). Estudo do comportamento alimentar do pepino do mar *(Holothuria grisea*), submetido a diferentes dietas e fotoperíodos. Dissertação de mestrado. Universidade Federal do Ceará. |
| 1. Silva P.L. (2011). Mecanismos celulares e teciduais da regeneração em holotúrias (Echinodermata: Holothuroidea). Dissertação de Mestrado, Instituto de Biociências, University of São Paulo, São Paulo. doi:10.11606/D.41.2011.tde-20012012-090245. |
| 1. Soares P.A.G., Ribeiro K.A., Valente A.P., Capillé N.V., Stephan-Nicollas Oliveira M. C. G., Tovar A.N.F., Pereira M.S., Vilanova E., Mourão P.A.S. (2018). A unique fucosylated chondroitin sulfate type II with strikingly homogeneous and neatly distributed α-fucose branches. *Glycobiology* 28 (8), 565-579. https://doi.org/10.1093/glycob/cwy048 |
| 1. Souza Júnior, J. de. (2017). Utilização de microchips para marcação de pepinos do mar da espécie *Holothuria grisea*. Dissertação (Mestrado em Engenharia de Pesca), Universidade Federal do Ceará, Fortaleza, 50 p. |
| 1. Souza Junior J., Ponte I., Coe C.M., Farias W.R.L., Feitosa C.V., Hamel J.-F., Mercier, A. (2017). Sea cucumber fisheries in Northeast Brazil. *SPC Beche-de-mer Information Bulletin #37*. |
| 1. Souza M.E.M. de, Leite L.V., Pinheiro R.R.R., Sousa Junior J. de, Nunes J. F., Salmito-Vanderley C.S.B. (2014). Gonadal index *Holothuria grisea* in Ceará. *Acta Veterinaria Brasilica*, 8 (2), 229-230. |
| 1. Sousa S.T. (2021). Características texturais e geoambientais das áreas de ocorrência do pepino do mar, *Holothuria grisea* (Echinodermata: Holothuroidea), Bitupitá-Ceará. *Revista GeoUECE* 3 (5), 235–237. https://revistas.uece.br/index.php/GeoUECE/article/view/6980. |
| 1. Tiago C.G., Brites A.D., Kawauchi G.Y. (2005). A simple enzymatic method for examining calcite ossicles of Echinodermata. *Journal of Microscopy* 218, 240-246. <https://doi.org/10.1111/j.1365-2818.2005.01486.x> |
| 1. Tomita R. Y., Munhoz R. R., Torres G. F., Furlan É. F., Casarini L. M. (2019). Valor nutricional de espécies marinhas comercializadas no mercado informal. *Hig. Aliment*. 33 (288/289), 1177-1181. |
| 1. Vidolin D., Santos-Gouvea I., Freire C. A. (2002). Estabilidade osmótica dos fluídos celômicos de um pepino do mar (*Holothuria grisea*) e de uma estrela-do-mar (*Asterina stellifera*) (Echinodermata) expostos ao ar durante a maré baixa: um estudo de campo. *Acta Biol. Par.* |
| 1. Ventura, C.R.R. et al. (2013). *Echinoderm from Brazil: Historical Research and the Current State of Biodiversity Knowledge*. In: Alvarado, J., Solis-Marin, F. (eds) Echinoderm Research and Diversity in Latin America. Springer, Berlin, Heidelberg. https://doi.org/10.1007/978-3-642-20051-9_9 |
| 1. Xavier L.A.R. (2010). Inventário dos equinodermos do Estado de Santa Catarina, Brasil. *Brazilian Journal of Aquatic Science and Technology* 14 (2), 73-78. http://dx.doi.org/10.14210/bjast.v14n2.p73-78 |
| 1. Yamazaki Y., Sakai Y., Mino S., Suda W., Hattori M., Meirelles P.M., Thompson F., Sawabe T. (2019). Repeated selective enrichment process of sediment microbiota occurred in sea cucumber guts. *Environmental Microbiology Report*s 11, 797-807. https://doi.org/10.1111/1758-2229.12791 |
| 1. Yamazaki Y., Meirelles P., Mino S. et al. (2016). Individual *Apostichopus japonicus* fecal microbiome reveals a link with polyhydroxybutyrate producers in host growth gaps. *Sci Rep* 6, 21631. https://doi.org/10.1038/srep21631 |

## Data for graph 1.

| **Year** | **Institution** | **Number of studies** |
| --- | --- | --- |
| 2000 | UFBA | 1 |
| 2002 | UFPR | 1 |
| 2002 | UFPE | 1 |
| 2005 | UFBA | 1 |
| 2005 | USP | 2 |
| 2006 | USP | 2 |
| 2008 | UFPB | 1 |
| 2008 | USP | 1 |
| 2009 | UFPE | 1 |
| 2010 | UFS | 1 |
| 2010 | UFRJ | 3 |
| 2010 | UNIVALI | 1 |
| 2011 | USP | 1 |
| 2012 | UFBA | 1 |
| 2012 | UFCE | 1 |
| 2012 | UFPB | 1 |
| 2012 | UFSC | 1 |
| 2012 | UFAL | 1 |
| 2013 | UFRJ | 1 |
| 2013 | UFPB | 2 |
| 2013 | USP | 1 |
| 2013 | UFCE | 2 |
| 2013 | UFBA | 1 |
| 2014 | UFPB | 2 |
| 2014 | UFCE | 2 |
| 2014 | UFF | 1 |
| 2014 | UFVV | 2 |
| 2015 | UNICAMP | 1 |
| 2015 | UFAL | 1 |
| 2015 | UFRN | 1 |
| 2016 | UNICAMP | 1 |
| 2016 | UFCE | 3 |
| 2016 | UFPE | 1 |
| 2016 | UFRJ | 1 |
| 2017 | UFCE | 4 |
| 2017 | UFPB | 1 |
| 2017 | UFVV | 1 |
| 2018 | UFPR | 1 |
| 2018 | USP | 1 |
| 2018 | UFRJ | 1 |
| 2018 | UFCE | 1 |
| 2019 | UFCE | 2 |
| 2019 | UFRJ | 1 |
| 2019 | IP/SANTOS | 1 |
| 2020 | UFPB | 2 |
| 2021 | UFCE | 1 |
| 2021 | UEFS | 1 |
| 2022 | USP | 3 |
| 2023 | USP | 2 |
| 2023 | UFDPar | 1 |

## Data for graph 2.

| **Type of Study** | **Region** | **Number of publications** |
| --- | --- | --- |
| Master Dissertation | North | 0 |
| Master Dissertation | Northeast | 8 |
| Master Dissertation | Southeast | 3 |
| Master Dissertation | South | 1 |
| Doctoral thesis | North | 0 |
| Doctoral thesis | Northeast | 1 |
| Doctoral thesis | Southeast | 1 |
| Doctoral thesis | South | 0 |
| Article | North | 0 |
| Article | Northeast | 29 |
| Article | Southeast | 20 |
| Article | South | 3 |
| Book chapter | North | 0 |
| Book chapter | Northeast | 1 |
| Book chapter | Southeast | 2 |
| Book chapter | South | 0 |

## Data for graph 3.

| **Taxonomy** | **Ecology** | **Molecular** | **Reproductive Biology** | **Fishery** | **Review** |
| --- | --- | --- | --- | --- | --- |
| 27 | 13 | 20 | 4 | 4 | 1 |
